# Supplementary material
Source: PubMed Central journal article supplement (PMC5071781)

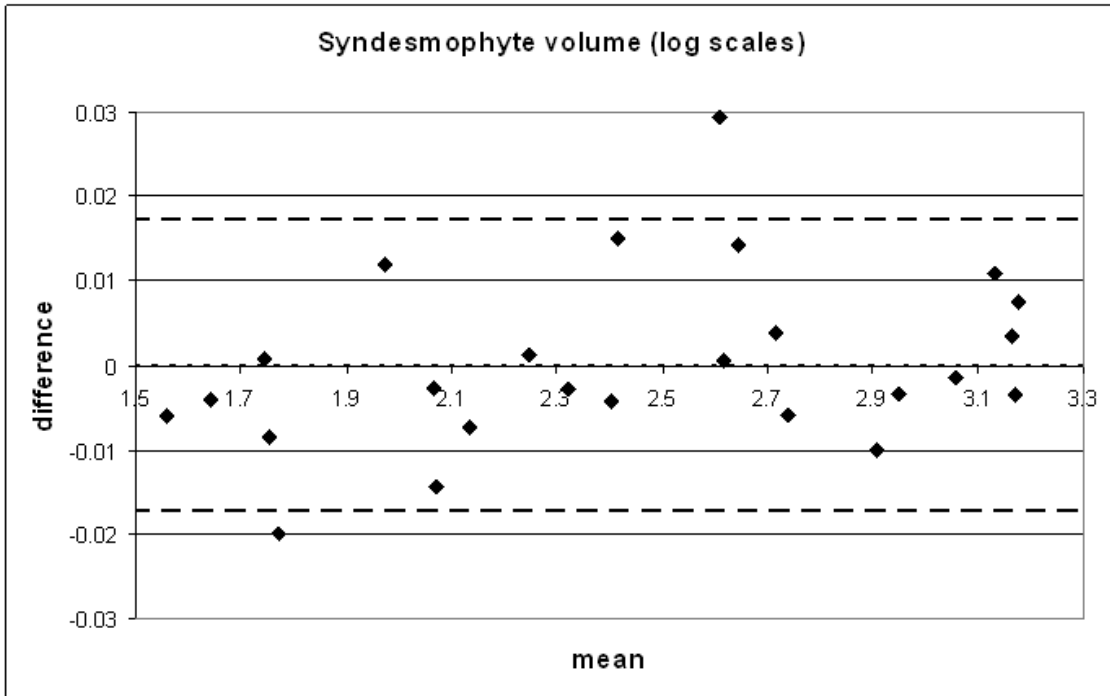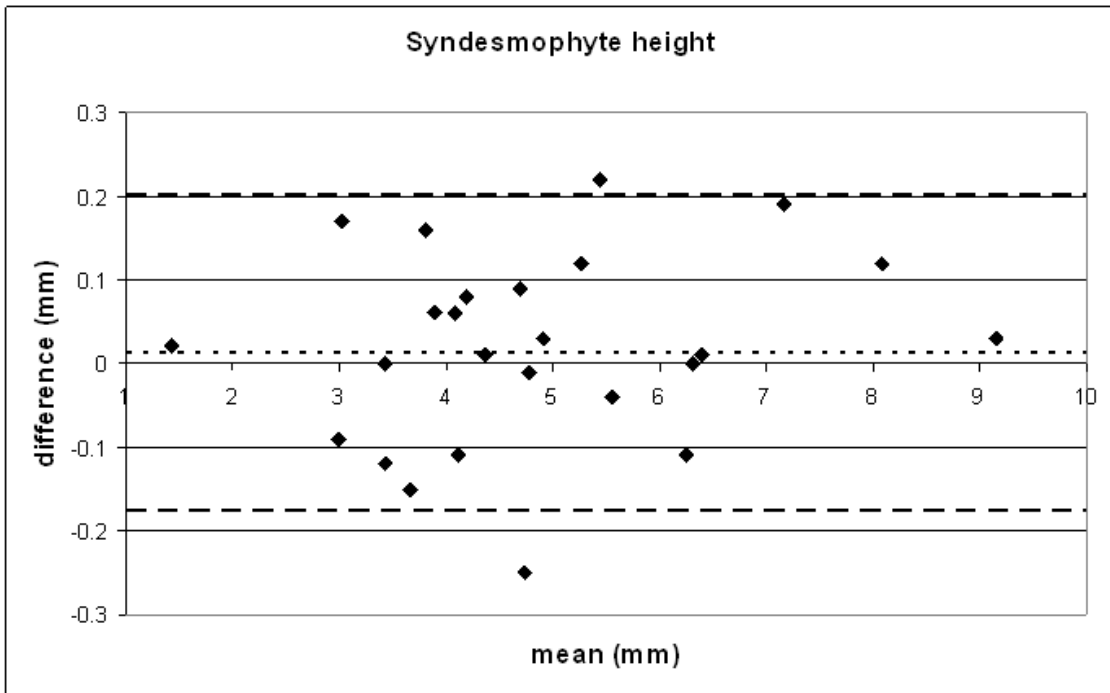

Supplement: NIHMS822828-supplement-Sup_fig1.pdf [file NIHMS822828-supplement-Sup_fig1.pdf]
